# Supplementary material for: Model Selection Emphasises the Importance of Non-Chromosomal Information in Genetic Studies
Source: PubMed Central journal article supplement (PMC4308103; doi:10.1371/journal.pone.0117014), 2015-01-27
Supplement: pone.0117014.s002.pdf [file pone.0117014.s002.pdf]

Supplementary information for:

## Model selection emphasises the importance of non-chromosomal information in genetic studies

Reda Rawi<sup>1</sup>, Mohamed El Anbari<sup>1,2</sup>, Halima Bensmail<sup>1,\*</sup>

1 Computational Science and Engineering Center, Qatar Computing Research Institute, Doha, Qatar

2 Division of Biomedical Informatics, Sidra Medical and Research Center, Doha, Qatar

\* E-mail: hbensmail@qf.org.qa

Table S2: Complexity of best statistical models chosen by LASSO for hierarchical interactions.

| Gene deletion            | Intercept | 1 Predictor | 2 Predictors | 3 Predictors |
|--------------------------|-----------|-------------|--------------|--------------|
| <i>MCM22</i>             | 943       | 55          | 1            | 1            |
| <i>PEP12</i>             | 0         | 0           | 0            | 1000         |
| <i>PEP7</i>              | 0         | 0           | 0            | 1000         |
| <i>PHO88</i>             | 357       | 20          | 156          | 467          |
| <i>SKI8</i>              | 0         | 3           | 0            | 997          |
| <i>VPS16</i>             | 0         | 126         | 4            | 870          |
| <i>PHO88(killer)</i>     | 0         | 44          | 3            | 953          |
| <i>PHO88(non-killer)</i> | 992       | 6           | 1            | 1            |
| <i>SKI8(killer)</i>      | 0         | 12          | 0            | 988          |
| <i>SKI8(non-killer)</i>  | 2         | 3           | 0            | 995          |

LASSO for hierarchical interactions was applied in each of the 1000 modelling repeats for all gene deletion experiments. Except for the control *MCM22* and the *PHO88(non-killer)* experiment most cases required three predictors in order to describe the given data best.
