# Supplementary material for: Model Selection Emphasises the Importance of Non-Chromosomal Information in Genetic Studies
Source: PubMed Central journal article supplement (PMC4308103; doi:10.1371/journal.pone.0117014), 2015-01-27
Supplement: pone.0117014.s003.pdf [file pone.0117014.s003.pdf]

Supplementary information for:

**Model selection emphasises the importance of non-chromosomal information in genetic studies**

Reda Rawi<sup>1</sup>, Mohamed El Anbari<sup>1,2</sup>, Halima Bensmail<sup>1,\*</sup>

**1 Computational Science and Engineering Center, Qatar Computing Research Institute, Doha, Qatar**

**2 Division of Biomedical Informatics, Sidra Medical and Research Center, Doha, Qatar**

**\* E-mail: hbensmail@qf.org.qa**

**Table S3: Frequency of predictors ( $X_1, X_2$  and  $X_1X_2$ .) within 1000 modelling repeats using LASSO for hierarchical interactions.**

| Gene deletion            | $X_1$ | $X_2$ | $X_1X_2$ |
|--------------------------|-------|-------|----------|
| <i>MCM22</i>             | 57    | 2     | 1        |
| <i>PEP12</i>             | 1000  | 1000  | 1000     |
| <i>PEP7</i>              | 1000  | 1000  | 1000     |
| <i>PHO88</i>             | 640   | 626   | 467      |
| <i>SKI8</i>              | 1000  | 997   | 997      |
| <i>VPS16</i>             | 1000  | 874   | 870      |
| <i>PHO88(killer)</i>     | 1000  | 956   | 953      |
| <i>PHO88(non-killer)</i> | 7     | 3     | 1        |
| <i>SKI8(killer)</i>      | 1000  | 988   | 988      |
| <i>SKI8(non-killer)</i>  | 998   | 995   | 995      |

Aside from the *MCM22* and *PHO88(non-killer)* gene deletion experiments, all variables ( $X_1, X_2$  and  $X_1X_2$ ) are selected in most modelling repeats. An exception is the *PHO88* deletion experiment where the interaction predictor ( $X_1X_2$ ) is selected in only half of the 1000 repeats.
